# Supplementary material for: Characterization and Metabolic Diversity of Flavonoids in Citrus Species
Source: PubMed Central journal article supplement (PMC5585201; doi:10.1038/s41598-017-10970-2), 2017-09-05
Supplement: 41598_2017_10970_MOESM1_ESM.pdf [file 41598_2017_10970_MOESM1_ESM.pdf]

## **Characterization and Metabolic Diversity of Flavonoids in Citrus Species**

Shouchuang Wang<sup>1</sup>, Chenkun Yang<sup>1</sup>, Hong Tu<sup>2</sup>, Junjie Zhou<sup>1</sup>, Xianqing Liu<sup>3</sup>, Yunjiang Cheng<sup>2</sup>,  
Jie Luo<sup>1,3</sup>, Xiuxin Deng<sup>2</sup>, Hongyan Zhang<sup>2\*</sup> & Juan Xu<sup>2\*</sup>

Emails and institutions addresses:

Shouchuang Wang (shouchuang.wang@webmail.hzau.edu.cn), Chenkun Yang (victoryang@webmail.hzau.edu.cn), Hong Tu (tuhong1989@126.com), Junjie Zhou (sand\_zhou@webmail.hzau.edu.cn), Xianqing Liu (liuxq@mail.hzau.edu.cn), Yunjiang Cheng (yjcheng@mail.hzau.edu.cn), Jie Luo (jie.luo@mail.hzau.edu.cn), Xiuxin Deng (xxdeng@mail.hzau.edu.cn), Hongyan Zhang (zhanghy@mail.hzau.edu.cn), Juan Xu (xujuan@mail.hzau.edu.cn).

<sup>1</sup>National Key Laboratory of Crop Genetic Improvement and National Center of Plant Gene Research (Wuhan), Huazhong Agricultural University, Wuhan 430070, China.

<sup>2</sup>Key Laboratory of Horticultural Plant Biology (Ministry of Education), College of Horticulture and Forestry Sciences, Huazhong Agricultural University, Wuhan 430070, China.

<sup>3</sup>College of Life Science and Technology, Huazhong Agricultural University, Wuhan 430070, China.

Correspondence and requests for materials should be addressed to H.Z and J.X. (zhanghy@mail.hzau.edu.cn; xujuan@mail.hzau.edu.cn)

Telephone number: 86-27-87286965; Fax number: 86-27-87280016.

## Supplementary information:

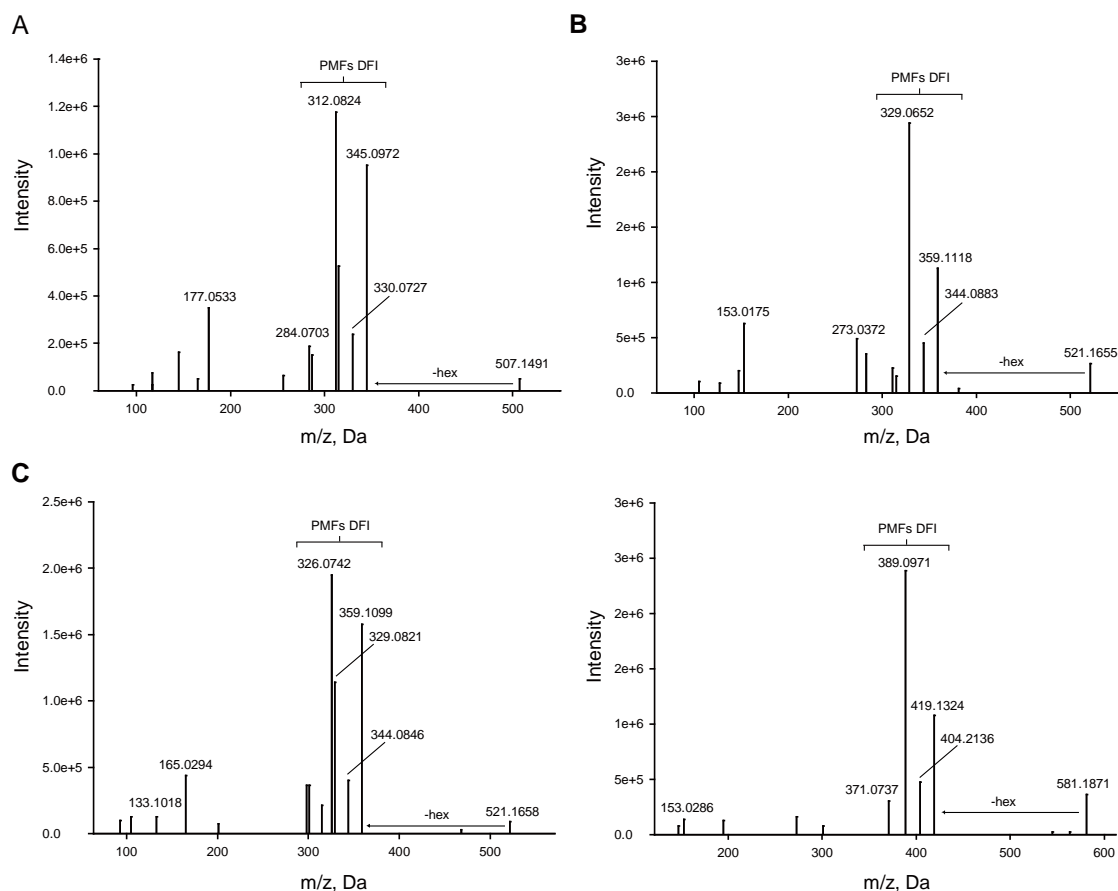

**Supplementary Figure 1. Mass spectra and structures of glycosylated PMF in Citrus.**

(A) Dihydroxy-trimethoxyflavone-*O*-hexoside (m116). (B)  
 Hydroxy-tetramethoxyflavone-*O*-hexoside (m120). (C)  
 Hydroxy-tetramethoxyflavone-*O*-hexoside (m121). (D)  
 Monohydroxy-hexamethoxyflavone-*O*-hexoside (m130). PMFs DFI, diagnostic fragment ions of polymethoxylated flavonoids.

### Supplementary Table S1.

**The information of Citrus accessions used in this study.**

This table is in a separate sheet.

### Supplementary Table S2.

**Loadings (correlation coefficients between the original variables and the principal components) of the three PCs (PC1, PC2 and PC3) for each Citrus species.**

This table is in a separate sheet.

### Supplementary Table S3.

**The (almost) non-redundant MS2T library of Citrus flavonoids.**

This table is in a separate sheet.

**Supplementary Table S4.**

**Accumulation of 117 flavonoids of various tissues in different Citrus species.**

This table is in a separate sheet.
